# Supplementary material for: Predicting and elucidating the etiology of fatty liver disease: A machine learning modeling and validation study in the IMI DIRECT cohorts
Source: PLoS Med. 2020 Jun 19;17(6):e1003149. doi: 10.1371/journal.pmed.1003149 (PMC7304567; doi:10.1371/journal.pmed.1003149)
Supplement: S1 TRIPOD Checklist — (DOCX) [file pmed.1003149.s030.docx]

| **Section/Topic** | **Ite** |  | **Checklist Item** | **Section and paragraph** |
| --- | --- | --- | --- | --- |
| **Title and abstract** | | | | |
| Title | 1 | D;V | Identify the study as developing and/or validating a multivariable prediction model, the target population, and the outcome to be predicted. | Title |
| Abstract | 2 | D;V | Provide a summary of objectives, study design, setting, participants, sample size, predictors, outcome, statistical analysis, results, and conclusions. | “Methods and Findings”  ”Conclusions” |
| **Introduction** | | | | |
| Background and objectives | 3a | D;V | Explain the medical context (including whether diagnostic or prognostic) and rationale for developing or validating the multivariable prediction model, including references to existing models. | Paragraphs 1-2 |
| 3b | D;V | Specify the objectives, including whether the study describes the development or validation of the model or both. | Paragraph 3 |
| **Methods** | | | | |
| Source of data | 4a | D;V | Describe the study design or source of data (e.g., randomized trial, cohort, or registry data), separately for the development and validation data sets, if applicable. | Section “*Participants (IMI DIRECT)”*  Section *External validation (UK Biobank cohort)* |
| 4b | D;V | Specify the key study dates, including start of accrual; end of accrual; and, if applicable, end of follow-up. | Section “*Participants (IMI DIRECT)”*  Citations *15,16* |
| Participants | 5a | D;V | Specify key elements of the study setting (e.g., primary care, secondary care, general population) including number and location of centres. | Section “*Participants (IMI DIRECT)”*  Citations 15,16, 18 and 36  S2 Fig |
| 5b | D;V | Describe eligibility criteria for participants. | Section “*Participants (IMI DIRECT)”*  Section *External validation (UK Biobank cohort)*  Citations 15,16, 18 and 36 |
| 5c | D;V | Give details of treatments received, if relevant. | NA |
| Outcome | 6a | D;V | Clearly define the outcome that is predicted by the prediction model, including how and when assessed. | Section “*Measures (IMI DIRECT)”*  Table 1  S1 Fig |
| 6b | D;V | Report any actions to blind assessment of the outcome to be predicted. | Section “*Measures (IMI DIRECT)”*  Fig 2 |
| Predictors | 7a | D;V | Clearly define all predictors used in developing or validating the multivariable prediction model, including how and when they were measured. | Section “*Measures (IMI DIRECT)”*  Section *“Feature selection (IMI DIRECT)”*  Fig 1  S1, S4 Tables |
| 7b | D;V | Report any actions to blind assessment of predictors for the outcome and other predictors. | Section *“Feature selection (IMI DIRECT)”*  Fig2, S5 Figs |
| Sample size | 8 | D;V | Explain how the study size was arrived at. | Section “*Measures (IMI DIRECT)”*  Section *“Feature selection (IMI DIRECT)”*  Fig 2 |
| Missing data | 9 | D;V | Describe how missing data were handled (e.g., complete-case analysis, single imputation, multiple imputation) with details of any imputation method. | Section *“Feature selection (IMI DIRECT)”* |
| Statistical analysis methods | 10a | D | Describe how predictors were handled in the analyses. | Section *“Feature selection (IMI DIRECT)”*  Section “*Model training and evaluation”* |
| 10b | D | Specify type of model, all model-building procedures (including any predictor selection), and method for internal validation. | Section *“Feature selection (IMI DIRECT)”*  Section “*Model training and evaluation”* |
| 10c | V | For validation, describe how the predictions were calculated. | Section *External validation (UK Biobank cohort)* |
| 10d | D;V | Specify all measures used to assess model performance and, if relevant, to compare multiple models. | Section *“Comparison with other fatty liver indices”* |
| 10e | V | Describe any model updating (e.g., recalibration) arising from the validation, if done. | NA |
| Risk groups | 11 | D;V | Provide details on how risk groups were created, if done. | NA |
| Development vs. validation | 12 | V | For validation, identify any differences from the development data in setting, eligibility criteria, outcome, and predictors. | Section *External validation (UK Biobank cohort)* |
| **Results** | | | | |
| Participants | 13a | D;V | Describe the flow of participants through the study, including the number of participants with and without the outcome and, if applicable, a summary of the follow-up time. A diagram may be helpful. | Methods  Table 1  S2 Table  Fig2  S5 Fig |
| 13b | D;V | Describe the characteristics of the participants (basic demographics, clinical features, available predictors), including the number of participants with missing data for predictors and outcome. | Methods  Fig2,  S2, S5 Fig, |
| 13c | V | For validation, show a comparison with the development data of the distribution of important variables (demographics, predictors and outcome). | Methods  Table 2 |
| Model development | 14a | D | Specify the number of participants and outcome events in each analysis. | Fig2  S5 Fig |
| 14b | D | If done, report the unadjusted association between each candidate predictor and outcome. | Fig 1 |
| Model specification | 15a | D | Present the full prediction model to allow predictions for individuals (i.e., all regression coefficients, and model intercept or baseline survival at a given time point). | Section “*Clinical models (Models 1-3)”*  Section “*Performance metrics “*  Section “*Omics models separately or in combination with clinical variables (models 5-14)”*  Section ”*Additional proteomic and metabolomic analyses (models 15-18)”* |
| 15b | D | Explain how to the use the prediction model. | Section “*Clinical models (Models 1-3)”*  Section “*Performance metrics “*  Section “*Omics models separately or in combination with clinical variables (models 5-14)”*  Section ”*Additional proteomic and metabolomic analyses (models 15-18)”* |
| Model performance | 16 | D;V | Report performance measures (with CIs) for the prediction model. | Section “*Clinical models (Models 1-3)”*  Section “*Performance metrics “*  Section “*Validation in UK Biobank and IMI DIRECT”*  Section “*Omics models separately or in combination with clinical variables (models 5-14)”*  Section ”*Additional proteomic and metabolomic analyses (models 15-18)”* |
| Model-updating | 17 | V | If done, report the results from any model updating (i.e., model specification, model performance). | Section “*Performance metrics “* |
| **Discussion** | | | | |
| Limitations | 18 | D;V | Discuss any limitations of the study (such as nonrepresentative sample, few events per predictor, missing data). | Paragraphs 9-10 |
| Interpretation | 19a | V | For validation, discuss the results with reference to performance in the development data, and any other validation data. | Paragraphs 1,10 |
| 19b | D;V | Give an overall interpretation of the results, considering objectives, limitations, results from similar studies, and other relevant evidence. | Paragraphs 6-8 |
| Implications | 20 | D;V | Discuss the potential clinical use of the model and implications for future research. | Paragraphs 11-13 |
| **Other information** | | | | |
| Supplementary information | 21 | D;V | Provide information about the availability of supplementary resources, such as study protocol, Web calculator, and data sets. | S1 text,  <http://www.predictliverfat.org/> |
| Funding | 22 | D;V | Give the source of funding and the role of the funders for the present study. | The work leading to this has received support from the Innovative Medicines Initiative Joint Undertaking under grant agreement n°115317 (DIRECT), resources of which are composed of financial contribution from the European Union's Seventh Framework Programme (FP7/2007-2013) and EFPIA companies’ in kind contribution. |

*Items relevant only to the development of a prediction model are denoted by D, items relating solely to a validation of a prediction model are denoted by V, and items relating to both are denoted D;V. We recommend using the TRIPOD Checklist in conjunction with the TRIPOD Explanation and Elaboration document.
