# Supplementary material for: Predicting and elucidating the etiology of fatty liver disease: A machine learning modeling and validation study in the IMI DIRECT cohorts
Source: PLoS Med. 2020 Jun 19;17(6):e1003149. doi: 10.1371/journal.pmed.1003149 (PMC7304567; doi:10.1371/journal.pmed.1003149)
Supplement: S5 Table — (XLSX) [file pmed.1003149.s026.xlsx]

## Sheet: Sheet1
Models	Diabetes cohort	Non-diabetes cohort
1	0.70 (95% CI=0.68, 0.72, p-value<0.001)	0.70 (95% CI=0.69, 0.72, p-value<0.001)
2 (fasting glucose)	0.74 (95% CI=0.71, 0.75, p-value<0.001)	0.78 (95% CI=0.76, 0.79, p-value<0.001)
2 (HbA1c)	0.73 (95% CI=0.71, 0.75, p-value<0.001)	0.78 (95% CI=0.76, 0.79, p-value<0.001)
3	0.79 (95% CI=0.77, 0.81, p-value<0.001)	0.80 (95% CI=0.78, 0.81, p-value<0.001)
FLI	0.76 (95% CI=0.71, 0.80, p-value<0.001)	0.76 (95% CI=0.73, 0.79, p-value<0.001)
HSI	0.75 (95% CI=0.70, 0.79, p-value<0.001)	0.72 (95% CI=0.68, 0.75, p-value<0.001)
NAFLD-LFS	0.80 (95% CI=0.77, 0.85, p-value<0.001)	0.77 (95% CI=0.74, 0.80, p-value<0.001)
